# Supplementary material for: P2X7 Receptor Stimulation Is Not Required for Oxalate Crystal-Induced Kidney Injury
Source: PubMed Central journal article supplement (PMC6934555; doi:10.1038/s41598-019-56560-2), 2019-12-27
Supplement: 41598_2019_56560_MOESM1_ESM.pdf [file 41598_2019_56560_MOESM1_ESM.pdf]

## **P2X7 Receptor Stimulation Is Not Required for Oxalate Crystal-Induced Kidney Injury**

Hannah L. Luz, Martin Reichel, Robert J. Unwin, Kerim Mutig, Ana C. Najenson, Louise M. Tonner, Kai-Uwe Eckardt, Frederick W.K. Tam, Felix Knauf



2 – Uncropped original western blots figure 2B.

kDa

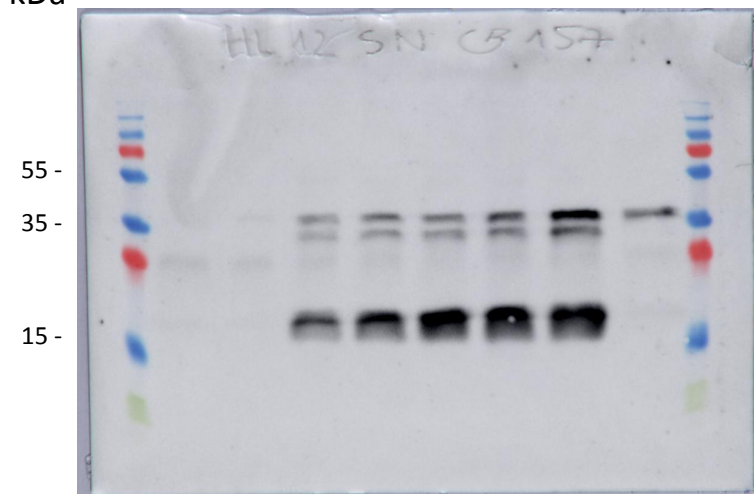

supernatant

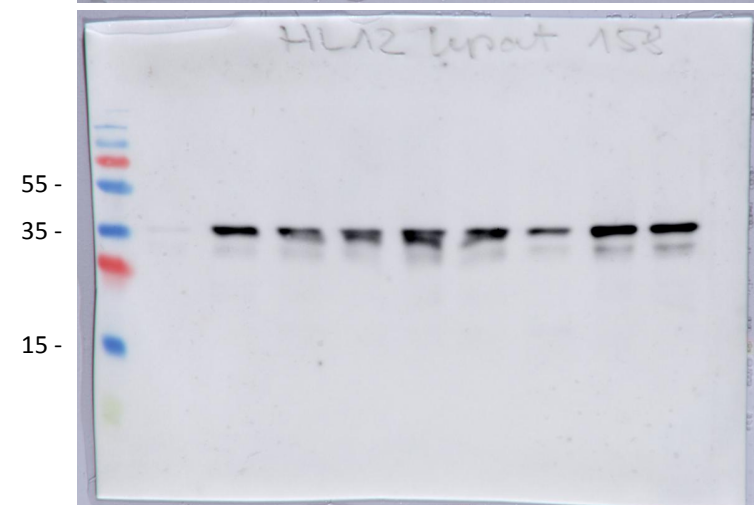

Lysate IL-1 $\beta$

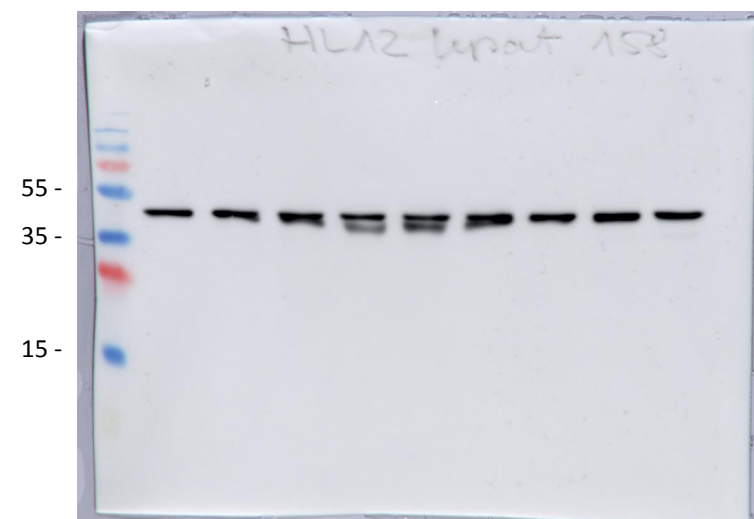

Lysate  $\beta$ -Actin

INH

Molecular weight marker

|  | -  | + | -  | + | -   | + | -   | + |
|--|----|---|----|---|-----|---|-----|---|
|  | CO |   | OX |   | MSU |   | ATP |   |

SN: Molecular weight marker/  
Lysate: repeat LPS+ATP+INH

### 3 – Uncropped original western blots figure 3B.

kDa

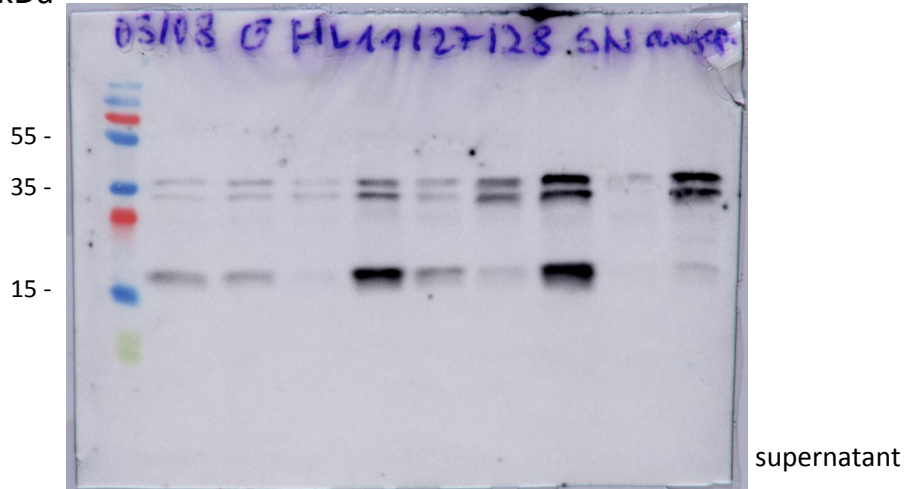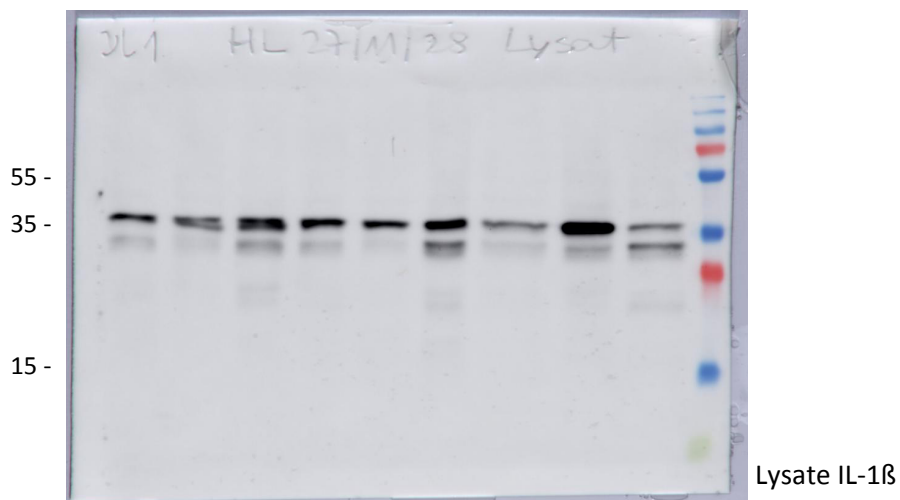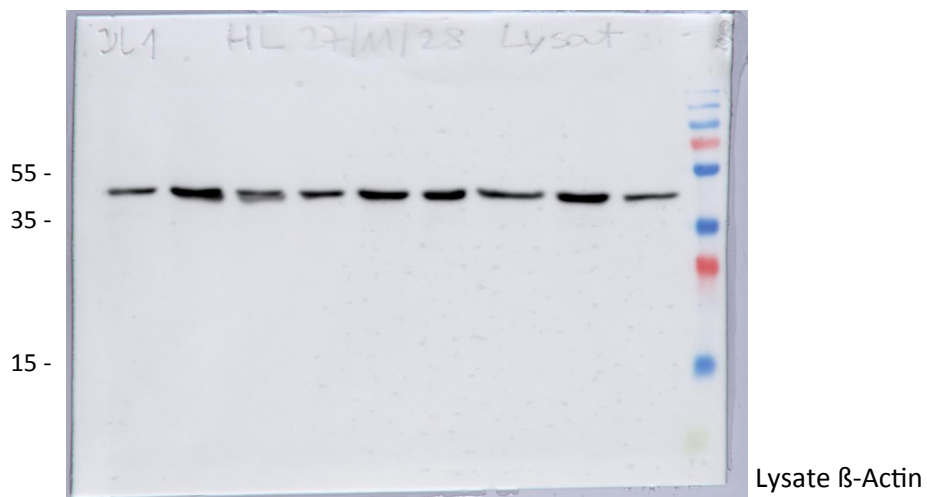

|                         |    |                     |                      |     |                     |                      |     |                     |                      |                         |
|-------------------------|----|---------------------|----------------------|-----|---------------------|----------------------|-----|---------------------|----------------------|-------------------------|
| Molecular weight marker | WT | P2X7 <sup>-/-</sup> | Casp1 <sup>-/-</sup> | WT  | P2X7 <sup>-/-</sup> | Casp1 <sup>-/-</sup> | WT  | P2X7 <sup>-/-</sup> | Casp1 <sup>-/-</sup> | Molecular weight marker |
|                         | OX |                     |                      | MSU |                     |                      | ATP |                     |                      |                         |

#### 4 – qPCR confirming absence of P2X7 mRNA in P2X7<sup>-/-</sup> mice.

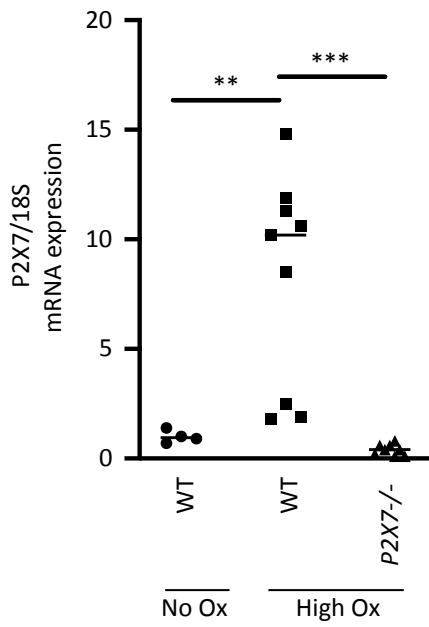

Data are presented as mean. n=4 for WT animals on control diet, n=9 for littermate WT on high soluble oxalate diet, n=8 for P2X7<sup>-/-</sup> animals. Statistical analysis was performed using one-way ANOVA. \*\*\*P<0,001; \*\*P<0,01.

## 5 – Plasma BUN and creatinine in WT littermates and $P2X7^{-/-}$ mice *in vivo*.

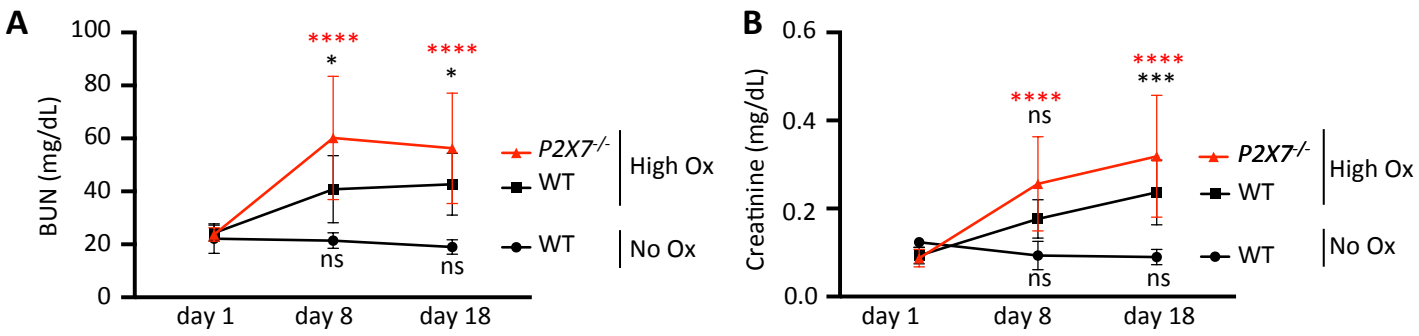

Data are presented as mean  $\pm$  SD. n=4 for WT animals on control diet, n=9 for littermate WT on high soluble oxalate diet, n=8 for  $P2X7^{-/-}$  animals. Statistical analysis was performed using two-way ANOVA. \*\*\*\*P<0,0001; \*\*\*P<0,001; \*P<0,05; ns, not significant.

## 6 – P2X7<sup>-/-</sup> and WT littermate mice with oxalate-induced kidney injury demonstrate no difference in renal injury and fibrosis.

A

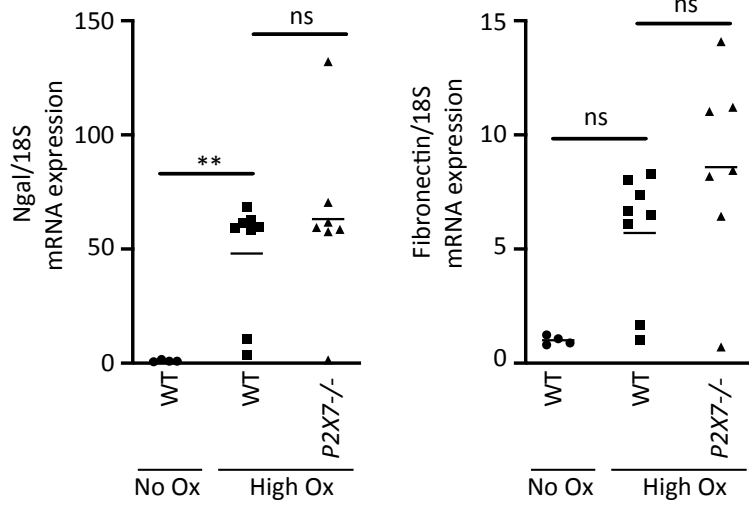

Data are presented as mean. n=4 for WT animals on control diet, n=8 for littermate WT on high soluble oxalate diet, n=8 for P2X7<sup>-/-</sup> animals. Statistical analysis was performed using one-way ANOVA. \*\*P<0.01; ns, not significant.
